# Supplementary material for: Tumor microenvironment changes after treatment with avelumab and immune- stimulating agent combinations in patients with advanced solid tumors
Source: Research Square preprint supplement (doi:10.21203/rs.3.rs-7775526/v1), 2026-01-19
Supplement: Supplementary file 1 [file 03906c391ab0d6bada80ba0f.xlsx]

## Sheet: Sheet1
Additional file 4: Flow cytometry Antibody list
Panel	Surface Antibody	Company	Catalog	Clone	Isotype	Used amount (Volume/sample)	RRIDs
Myeloid	CD3 FITC	Biolegend	300406	UCHT1	mIgG1 k	5	AB_314060
	CD19 FITC	Biolegend	302206	HIB19	mIgG1 k	5	AB_314236
	CD20 FITC	Biolegend	302304	2H7	mIgG2b k	5	AB_314252
	CD56 FITC	Biolegend	318304	HCD56	mIgG1 k	5	AB_604100
	HLA-DR PerCP-Cy5.5	BD Biosciences	560652	G46-6	mIgG2a k	5	AB_1727529
	CD14 BV421	BD Biosciences	563743	MφP9	mIgG2b k	4	AB_2744289
	Live/Dead Yellow	Life Technologies	L-34967			1
	CD16 BV605	BD Biosciences	563172	3G8	CDF1 IgG1 k	4	AB_2744297
	PD-L1 (CD274) BV650	BD Biosciences	563740	MIH1	mIgG1 k	5	AB_2738398
	CD1c BV711	Biolegend	331536	L161	mIgG1 k	5	AB_2629760
	CD15 BV786	BD Biosciences	563838	HI98	mIgM k	4	AB_2738444
	CD141 PE	BD Biosciences	559781	1A4	mIgG1 k	10	AB_397322
	CD33 PE-CF594	BD Biosciences	562492	WM53	mIgG1 k	5	AB_2713912
	CD123 PE-Cy7	eBioscience	25-1239-42	6H6	mIgG1 k	5	AB_1257136
	PD-L2 (CD273) APC	Biolegend	345508	MIH18	mIgG1 k	5	AB_2162176
	CD86 Alexa Fluor 700	BD Biosciences	561124	FUN-1	mIgG1 k	3	AB_10564087
	CD11b APC-Fire750	Biolegend	301352	ICRF44	mIgG1 k	4	AB_2629678
	CD45 BUV395	BD Biosciences	563792	HI30	mIgG1 k	5	AB_2869519
T and NK cell	41BB (CD137) FITC	eBioscience	11-1379-42	4B41	mIgG1 k	5	AB_1272070
	CD3 PerCP-Cy5.5	BD Biosciences	340949	SK7	mIgG1 k	10	AB_400190
	Foxp3 eFluor 450	eBioscience	48-4776-42	PCH101	RIgG k	5	AB_1834364
	Live/Dead Yellow	Life Technologies	L-34968			1
	CD16 BV605	BD Biosciences	563172	3G8	CDF1 IgG1 k	3	AB_2744297
	PD-1 (CD279) BV650	BD Biosciences	564104	EH12	mIgG1 k	3	AB_2738595
	OX40 (CD134) BV711	BD Biosciences	563664	ACT35	mIgG1 k	5	AB_2738359
	CTLA4 (CD152) BV786	BD Biosciences	563931	BNI3	mIgG2a k	3	AB_2738491
	CCR7 (CD197) PE	Biolegend	353204	G043H7	mIgG2a k	5	AB_10913813
	CD56 PE-CF594	BD Biosciences	562289	B159	mIgG1 k	5	AB_11152080
	CD45RO PE-Cy7	Biolegend	304230	UCHL1	mIgG2a k	5	AB_11203900
	Ki67 APC	eBioscience	17-5699-42	20Raj1	mIgG1 k	5	AB_2573218
	CD8 Alexa Fluor 700	BD Biosciences	557945	RPA-T8	mIgG1 k	5	AB_2916791
	CD25 APC-eFluor780	eBioscience	47-0259-42	BC96	mIgG1 k	5	AB_2016667
	CD45 BUV395	BD Biosciences	563792	HI30	mIgG1 k	5	AB_2869519
	CD4 BUV496	BD Biosciences	564651	SK3	mIgG1 k	5	AB_2744422
