# Supplementary material for: Tumor microenvironment changes after treatment with avelumab and immune- stimulating agent combinations in patients with advanced solid tumors
Source: Research Square preprint supplement (doi:10.21203/rs.3.rs-7775526/v1), 2026-01-19
Supplement: Supplementary file 2 [file 21b8342442dbd2fd88297888.xlsx]

## Sheet: Sheet1
Additional file 3. Antibody optimization by multiplex immunofluorescence using the Opal fluorophores (Akoya Biosciences/PerkinElmer).
Panel	Antibody	Clone	Vendor	Catalog#	AR	Antibody dilution	F	F dilution	Pos	RRID
1	PD-1	[EPR4877(2)]	ABCAM	ab137132	PH9	1:3000	650	1:200	1	AB_2894867
	CD8	C8/144B	Thermo Scientific	MS-457s	PH6	1:25	540	1:100	2	AB_61027
	CK	AE1/AE3	DAKO	M351501-2	PH6	1:50	620	1:100	3	AB_263130
	CD68	PG-M1	DAKO	M087601-2	PH6	1:25	520	1:100	4	AB_2074844
	CD3	Polyclonal	DAKO	A045201-2	PH6	1:100	690	1:100	5	AB_2861055
	PD-L1	E1L3N	Cell Signaling Technology	13684S	PH6	1:1000	570	1:100	6	AB_2687655
2	CD3	Polyclonal	DAKO	A045201-2	PH9	1:100	690	1:100	1	AB_2861055
	CD8	C8/144B	Thermo Scientific	MS-457s	PH6	1:25	540	1:100	2	AB_61027
	CK	AE1/AE3	DAKO	M351501-2	PH6	1:50	620	1:100	3	AB_263130
	CD45RO	UCHL1	Leica Biosystems	PA0146	PH6	RTU	520	1:100	4	AB_10555991
	FOXP3	D2W8E	Cell Signaling Technology	98377S	PH6	1:50	650	1:200	5	AB_2747370
	GZB	11F1	Leica Biosystems	PA0291	PH6	RTU	570	1:100	6	AB_10555276
4	TIM3	D5D5R	Cell Signaling Technology	45208S	PH6	1:100	540	1:100	1	AB_2716862
	LAG3	D2G4O	Cell Signaling Technology	15372S	PH6	1:200	650	1:100	2	AB_2798739
	ICOS	D1K2T	Cell Signaling Technology	89601S	PH6	1:200	520	1:100	3	AB_2800142
	CD20cy	L26	DAKO	M075501-2	PH9	RTU	620	1:100	4	AB_2282030
	OX40	ACT-3	Affimetrix (eBioscience)	14-1347-82	PH6	1:10	570	1:100	5	AB_467479
	CD3	Polyclonal	DAKO	A045201-2	PH6	1:200	690	1:100	6	AB_2861055
	CK	AE1/AE3	DAKO	M351501-2	PH6	1:25	coum	1:50	7	AB_263130
AR, antigen retrieval; GZB, granzyme B; CK, cytokeratin; F, fluorophores; Pos, Antibody position in the panels; coum, coumarin.
