# Supplementary material for: Tumor microenvironment changes after treatment with avelumab and immune- stimulating agent combinations in patients with advanced solid tumors
Source: Research Square preprint supplement (doi:10.21203/rs.3.rs-7775526/v1), 2026-01-19
Supplement: Supplementary file 3 [file 50fe4a6b6291439b56ecdc7c.xlsx]

## Sheet: Sheet1
Additional file 1: Timing of drug dosing and sample collection
Cohorts	Treatment schedule	Biopsy collection schedule	Blood collection schedule
Arm A-C expansion	Avelumab starting C1D15	BSL, C1D15	BSL, C1D15
		C3D1, EOT (opt)	C3D1, EOT (opt)
	Avelumab starting C3D1	BSL, C1D15	BSL, C1D15
		C3D15, EOT (opt)	C3D15, EOT (opt)
Arm D-F escalation/expansion	Avelumab starting C1D15, XRT starting C1D1-3 days	BSL, C3D1, EOT (opt)	BSL, C1D1, C1D15, C2D1, C3D1, EOT (opt)
	Avelumab starting C1D15, XRT starting C1D1-14 days	BSL, C3D1, EOT (opt)	BSL, C1D1, C1D15, C2D1, C3D1, EOT (opt)
	Avelumab starting C1D1, XRT starting C1D2-11	BSL, C2D1, EOT (opt)	BSL, C2D1, EOT (opt)
