# Supplementary material for: Tumor microenvironment changes after treatment with avelumab and immune- stimulating agent combinations in patients with advanced solid tumors
Source: Research Square preprint supplement (doi:10.21203/rs.3.rs-7775526/v1), 2026-01-19
Supplement: Supplementary file 4 [file d82f24c2d45f6a29420d3227.xlsx]

## Sheet: Sheet1
Additional file 2: IHC antibodies
IHC Antibodies
Marker	Clone	Vendor	Cat#	Dilution Factor	RRID
PD-L1	SP263	Ventana	790-4905	RTU	AB_2819099
CD137	D2Z4Y	CST	34594S	01:50:00	AB_2747410
OX40	ACT-35	eBioscience	12-1347-42	01:50:00	AB_10668832
